# Supplementary material for: Molecular Networking-Guided Isolation of New Etzionin-Type Diketopiperazine Hydroxamates from the Persian Gulf Sponge Cliona celata
Source: MDPI journal article supplement (doi:10.3390/md19080439), 2021-07-31

## *Supporting Information*

# **Molecular Networking-Guided Isolation of New Etzionin-Type Diketopiperazine Hydroxamates from the Persian Gulf Sponge *Cliona celata***

**Reza Mohsenian Kouchaksaraee<sup>1</sup>, Fengjie Li<sup>1</sup>, Melika Nazemi,<sup>2</sup> Mahdi Moridi Farimani <sup>3</sup> and Deniz Tasdemir <sup>1,4,\*</sup>**

<sup>1</sup> GEOMAR Centre for Marine Biotechnology (GEOMAR-Biotech), Research Unit Marine Natural Products Chemistry, GEOMAR Helmholtz Centre for Ocean Research Kiel, Am Kiel-Kanal 44, 24106 Kiel, Germany; rmohsenian@geomar.de; fli@geomar.de

<sup>2</sup> Persian Gulf and Oman Sea Ecological Center, Iranian Fisheries Science Research Institute, Agricultural Research, Education and Extension Organization (AREEO), 7916793165 Bandar Abbas, Iran; melikanazemi@pgoseri.ac.ir

<sup>3</sup> Department of Phytochemistry, Medicinal Plants and Drugs Research Institute, Shahid Beheshti University, G. C., Evin, 1983969411 Tehran, Iran; m\_moridi@sbu.ac.ir

<sup>4</sup> Faculty of Mathematics and Natural Sciences, Kiel University, Christian-Albrechts-Platz 4, 24118 Kiel, Germany

\* Correspondence: dtasdemir@geomar.de; Tel.: +49-431-6004430

| Content                                                                                                                                                   | Page No. |
|-----------------------------------------------------------------------------------------------------------------------------------------------------------|----------|
| <b>Table S1.</b> Putative identification of the compounds (clusters A and B) in the global molecular network of the crude extract of <i>Cliona celata</i> | 3        |
| <b>Figure S1.</b> Global molecular network of the crude extract of <i>Cliona celata</i>                                                                   | 4        |
| <b>Figure S2.</b> UPLC-HRMS chromatogram of the crude extract from <i>Cliona celata</i>                                                                   | 5        |
| <b>Figure S3.</b> <sup>1</sup> H NMR spectrum of the fraction F3 from <i>Cliona celata</i> (600 MHz, CD <sub>3</sub> OD)                                  | 5        |
| <b>Figure S4.</b> <sup>1</sup> H NMR spectrum of compound <b>1</b> (TFA salt, 600 MHz, CD <sub>3</sub> OD)                                                | 6        |
| <b>Figure S5.</b> <sup>13</sup> C NMR spectrum of compound <b>1</b> (TFA salt, 150 MHz, CD <sub>3</sub> OD)                                               | 6        |
| <b>Figure S6.</b> HSQC spectrum of compound <b>1</b> (TFA salt, 600 MHz, CD <sub>3</sub> OD, non-uniform sampling)                                        | 7        |
| <b>Figure S7.</b> HSQC spectrum of compound <b>1</b> (TFA salt, 600 MHz, CD <sub>3</sub> OD, traditional planes)                                          | 7        |
| <b>Figure S8.</b> HMBC spectrum of compound <b>1</b> (TFA salt, 600 MHz, CD <sub>3</sub> OD, non-uniform sampling)                                        | 8        |
| <b>Figure S9.</b> HMBC spectrum of compound <b>1</b> (TFA salt, 600 MHz, CD <sub>3</sub> OD, traditional planes)                                          | 8        |
| <b>Figure S10.</b> COSY spectrum of compound <b>1</b> (TFA salt, 600 MHz, CD <sub>3</sub> OD)                                                             | 9        |
| <b>Figure S11.</b> NOESY spectrum of compound <b>1</b> (TFA salt, 600 MHz, CD <sub>3</sub> OD)                                                            | 9        |
| <b>Figure S12.</b> HR-ESIMS spectrum of compound <b>1</b>                                                                                                 | 10       |
| <b>Figure S13.</b> <sup>1</sup> H NMR spectrum of compound <b>2</b> (TFA salt, 600 MHz, CD <sub>3</sub> OD)                                               | 11       |
| <b>Figure S14.</b> <sup>13</sup> C NMR spectrum of compound <b>2</b> (TFA salt, 150 MHz, CD <sub>3</sub> OD)                                              | 11       |
| <b>Figure S15.</b> HSQC spectrum of compound <b>2</b> (TFA salt, 600 MHz, CD <sub>3</sub> OD)                                                             | 12       |
| <b>Figure S16.</b> HMBC spectrum of compound <b>2</b> (TFA salt, 600 MHz, CD <sub>3</sub> OD)                                                             | 12       |
| <b>Figure S17.</b> COSY spectrum of compound <b>2</b> (TFA salt, 600 MHz, CD <sub>3</sub> OD)                                                             | 13       |
| <b>Figure S18.</b> NOESY spectrum of compound <b>2</b> (TFA salt, 600 MHz, CD <sub>3</sub> OD)                                                            | 13       |
| <b>Figure S19.</b> HR-ESIMS spectrum of compound <b>2</b>                                                                                                 | 14       |
| <b>Figure S20.</b> <sup>1</sup> H NMR spectrum of compound <b>3</b> (TFA salt, 600 MHz, CD <sub>3</sub> OD)                                               | 15       |
| <b>Figure S21.</b> <sup>13</sup> C NMR spectrum of compound <b>3</b> (TFA salt, 150 MHz, CD <sub>3</sub> OD)                                              | 15       |
| <b>Figure S22.</b> HSQC spectrum of compound <b>3</b> (TFA salt, 600 MHz, CD <sub>3</sub> OD)                                                             | 16       |
| <b>Figure S23.</b> HMBC spectrum of compound <b>3</b> (TFA salt, 600 MHz, CD <sub>3</sub> OD)                                                             | 16       |
| <b>Figure S24.</b> COSY spectrum of compound <b>3</b> (TFA salt, 600 MHz, CD <sub>3</sub> OD)                                                             | 17       |
| <b>Figure S25.</b> NOESY spectrum of compound <b>3</b> (TFA salt, 600 MHz, CD <sub>3</sub> OD)                                                            | 17       |
| <b>Figure S26.</b> HR-ESIMS spectrum of compound <b>3</b>                                                                                                 | 18       |

**Table S1.** Putative identification of the compounds (cluster A and B) in the global molecular network of the crude extract of *Cliona celata*.

| No. | <i>t<sub>R</sub></i> (min) | Parent mass <i>m/z</i> | Cluster | Molecular formula of the <i>m/z</i> [M + H] <sup>+</sup>      | Δ ppm | Key MS <sup>2</sup> fragments               | LoA* |
|-----|----------------------------|------------------------|---------|---------------------------------------------------------------|-------|---------------------------------------------|------|
| 1   | 5.43                       | 459.332                | A       | C <sub>26</sub> H <sub>43</sub> N <sub>4</sub> O <sub>3</sub> | 0.0   | 205.097; 238.217; 343.238; 385.249; 441.297 | 3    |
| 2   | 4.97                       | 473.293                | A       | C <sub>26</sub> H <sub>41</sub> N <sub>4</sub> O <sub>4</sub> | 0.4   | 221.093; 236.202; 357.213; 399.229; 456.887 | 3    |
| 3   | 5.42                       | 475.315                | A       | C <sub>26</sub> H <sub>43</sub> N <sub>4</sub> O <sub>4</sub> | 0.1   | 221.093; 252.233; 359.233; 401.244; 458.302 | 5    |
| 4   | 5.44                       | 489.332                | A       | C <sub>27</sub> H <sub>45</sub> N <sub>4</sub> O <sub>4</sub> | 0.2   | 221.093; 259.233; 359.233; 401.224; 471.333 | 5    |
| 5   | 6.03                       | 491.305                | A       | C <sub>26</sub> H <sub>43</sub> N <sub>4</sub> O <sub>5</sub> | 0.4   | 214.181; 238.218; 375.228; 417.240; 474.229 | 3    |
| 6   | 5.54                       | 503.359                | A       | C <sub>28</sub> H <sub>47</sub> N <sub>4</sub> O <sub>4</sub> | 0.4   | 221.093; 266.248; 359.233; 401.243; 485.347 | 3    |
| 7   | 5.86                       | 503.359                | A       | C <sub>28</sub> H <sub>47</sub> N <sub>4</sub> O <sub>4</sub> | 1.2   | 221.093; 266.249; 373.249; 415.259; 485.347 | 3    |
| 8   | 5.35                       | 505.338                | A       | C <sub>27</sub> H <sub>45</sub> N <sub>4</sub> O <sub>5</sub> | -0.1  | 221.090; 238.216; 359.233; 401.240; 487.332 | 3    |
| 9   | 6.04                       | 505.339                | A       | C <sub>27</sub> H <sub>45</sub> N <sub>4</sub> O <sub>5</sub> | 0.6   | 214.180; 252.232; 375.229; 417.246; 487.237 | 3    |
| 10  | 5.28                       | 637.373                | A       | C <sub>32</sub> H <sub>53</sub> N <sub>4</sub> O <sub>9</sub> | 0.8   | 221.093; 238.277; 359.232; 401.245; 553.339 | 3    |
| 11  | 7.04                       | 419.231                | B       | C <sub>23</sub> H <sub>35</sub> N <sub>2</sub> O <sub>5</sub> | 0.6   | 181.159; 196.170; 221.093; 359.233; 401.244 | 5    |
| 12  | 7.15                       | 403.235                | B       | C <sub>23</sub> H <sub>33</sub> N <sub>2</sub> O <sub>4</sub> | 0.6   | 181.159; 205.096; 315.242; 343.237; 385.247 | 3    |

\*: LoA (Level of Assignment); 1: Accurate mass matched to database-Tentative assignment, 2: Accurate mass matched to database and tandem MS spectrum matched to *in silico* fragmentation pattern, 3: Tandem MS spectrum matched to database or literature, 4: RT matched to standard compound, 5: MS/MS spectrum matched to standard compound.

Manual dereplication was performed considering the parent mass, biological source, retention time, elemental composition analysis, and predicated fragmentation patterns.

The MS<sup>2</sup> fragmentation pattern of a molecule was predicated on the Competitive Fragmentation Modeling for Metabolite Identification (CFM-ID) platform (<http://cfmid.wishartlab.com>) and compared with our experimental data.

**Figure S1.** Global molecular network of the crude extract of *Cliona celata*.

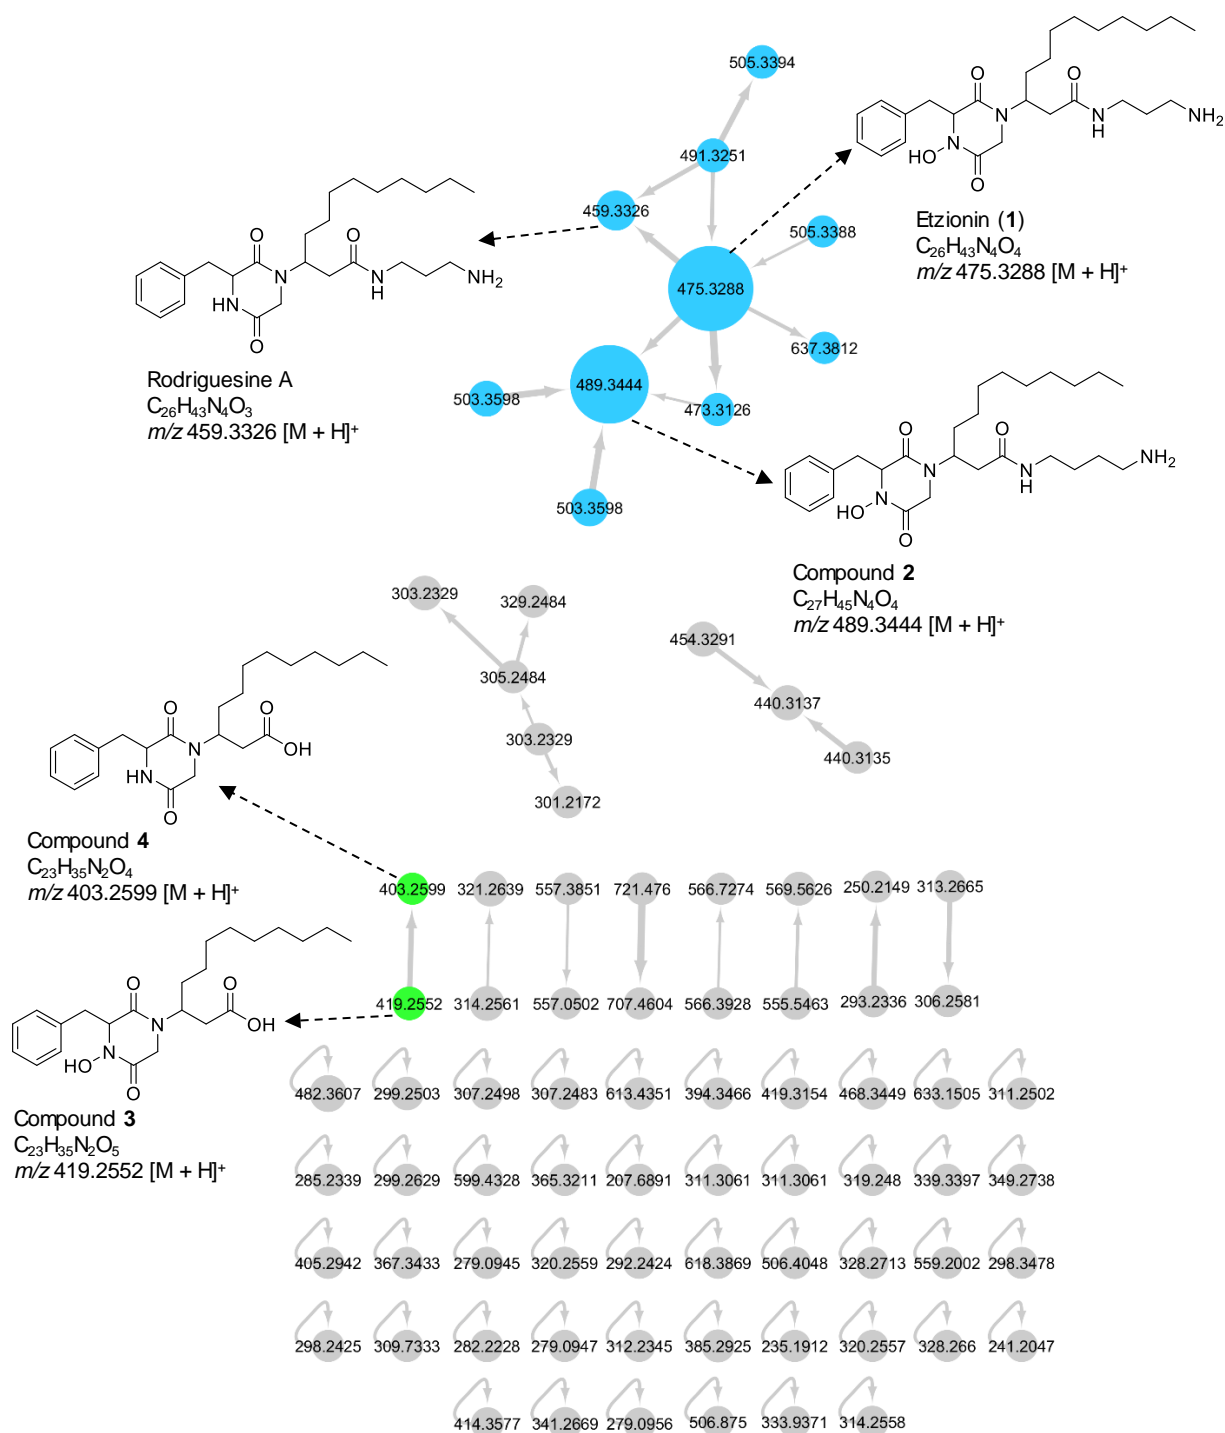

**Figure S2.** UPLC-HRMS chromatogram of the crude extract from *Cliona celata*.

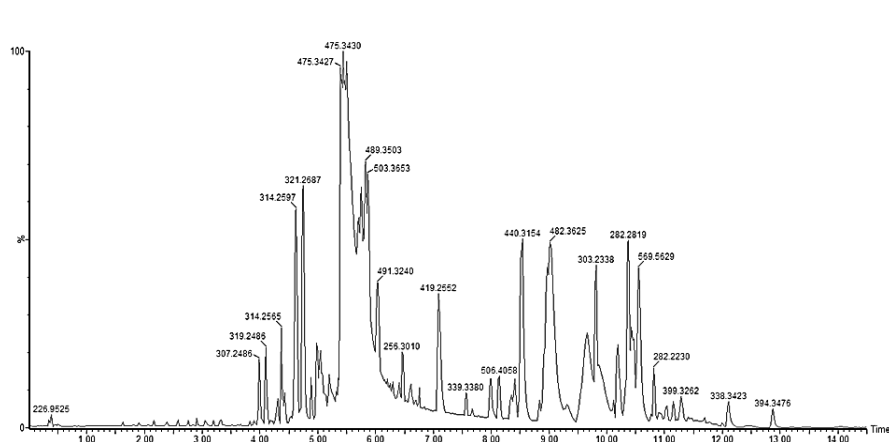

**Figure S3.**  $^1\text{H}$  NMR spectrum of the fraction F3 from *Cliona celata* (600 MHz,  $\text{CD}_3\text{OD}$ )

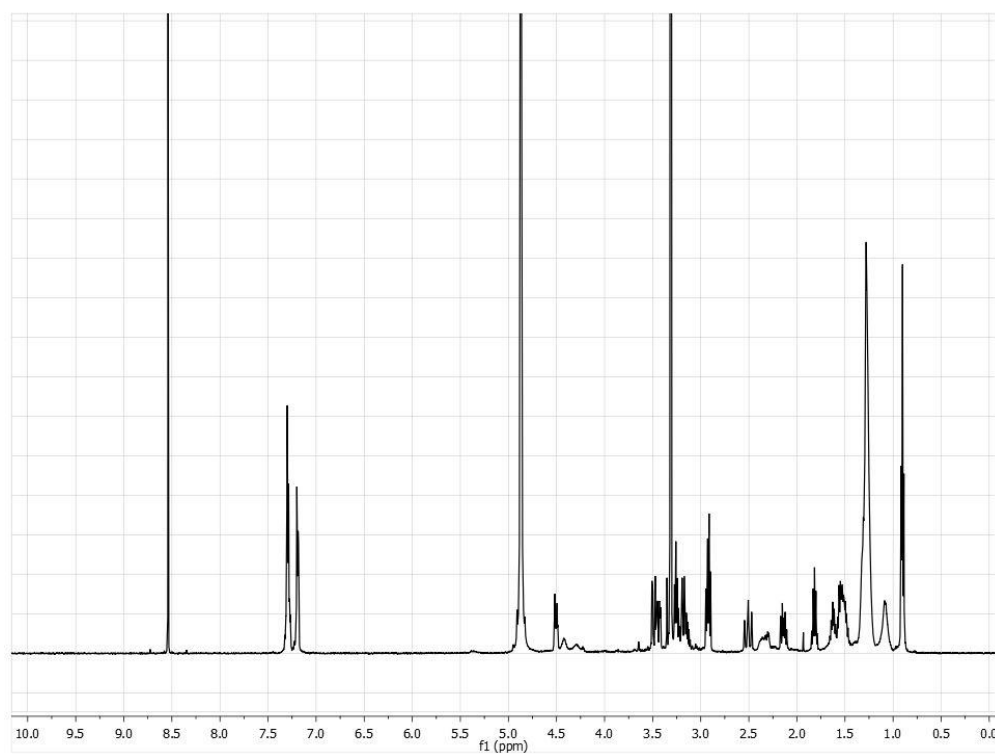

**Figure S4.**  $^1\text{H}$  NMR spectrum of compound **1** (TFA salt, 600 MHz,  $\text{CD}_3\text{OD}$ ).

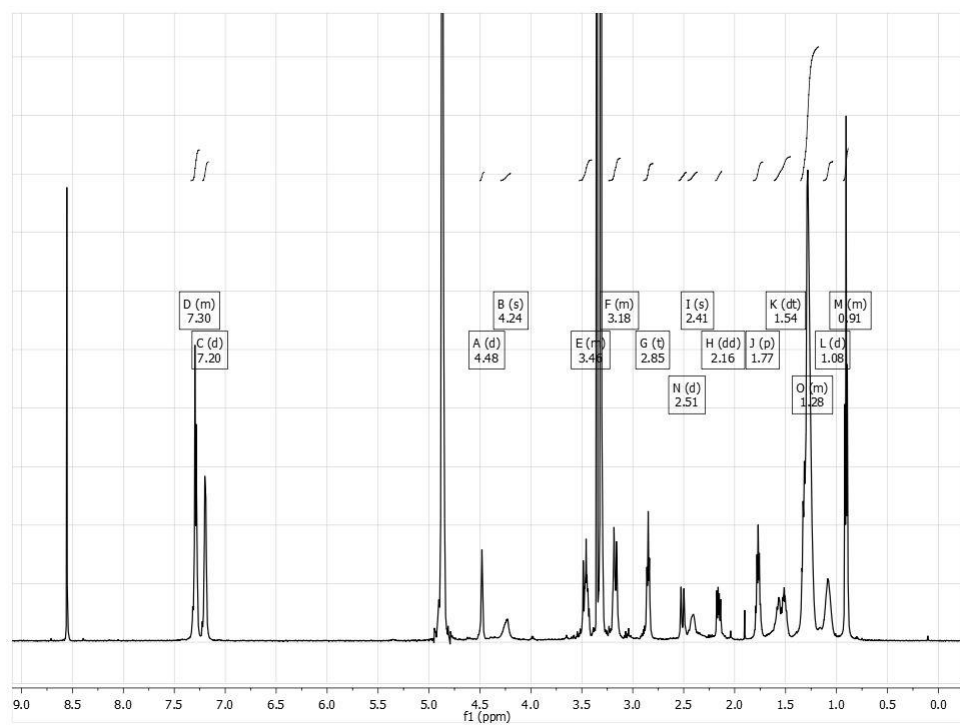

**Figure S5.**  $^{13}\text{C}$  NMR spectrum of compound **1** (TFA salt, 150 MHz,  $\text{CD}_3\text{OD}$ ).

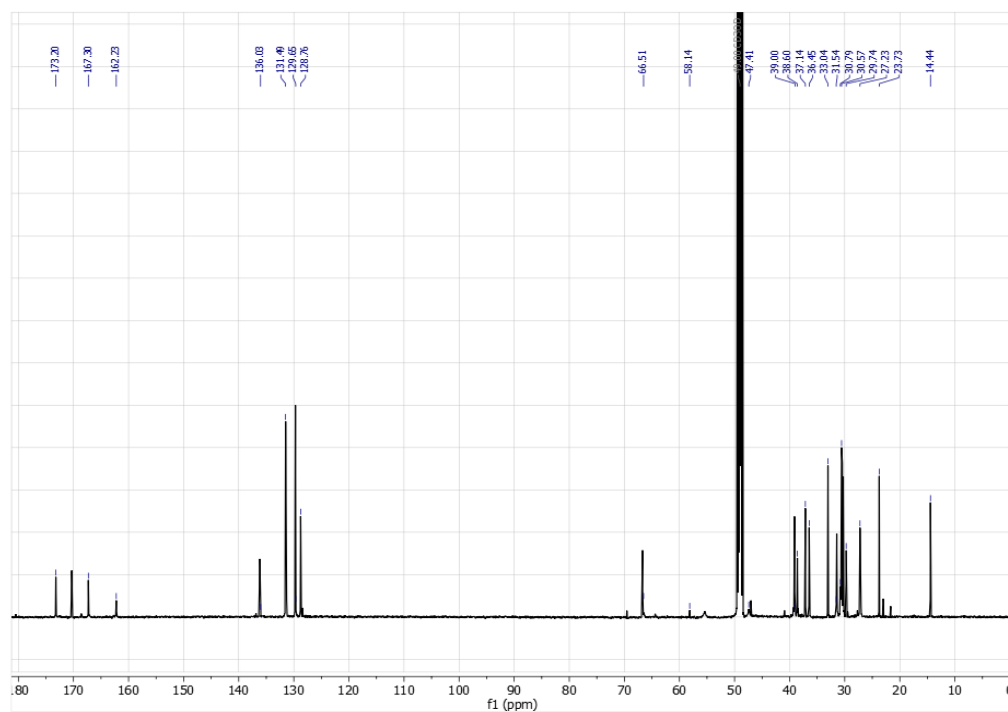

**Figure S6.** HSQC spectrum of compound **1** (TFA salt, 600 MHz, CD<sub>3</sub>OD, non-uniform sampling).

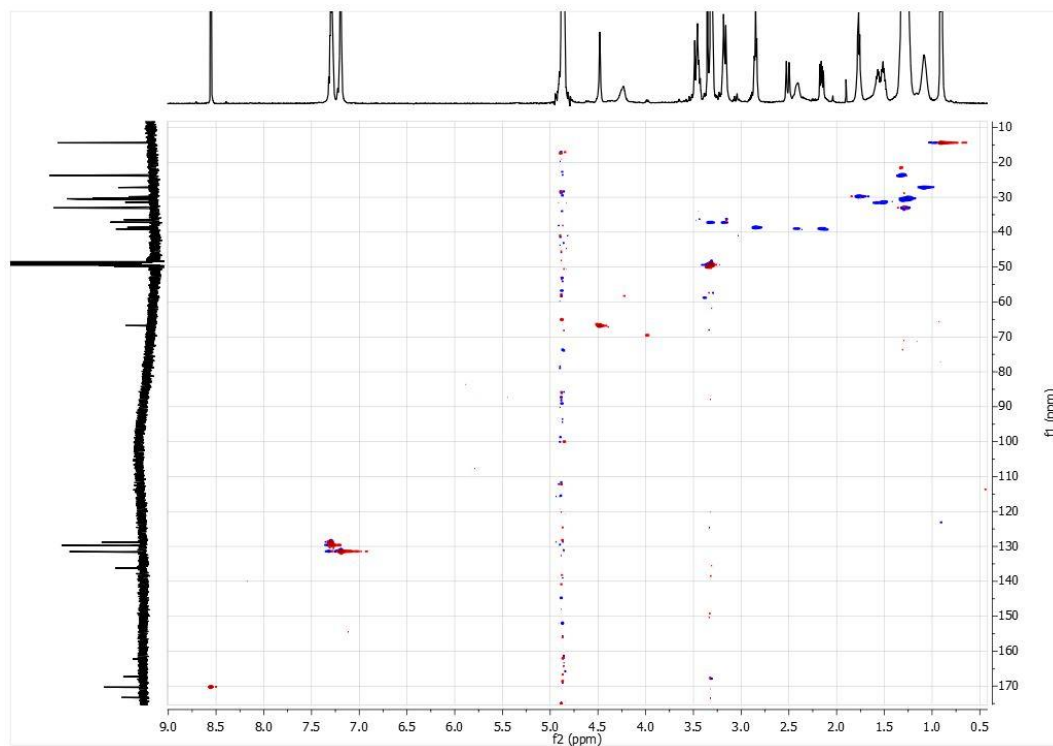

**Figure S7.** HSQC spectrum of compound **1** (TFA salt, 600 MHz, CD<sub>3</sub>OD, traditional planes).

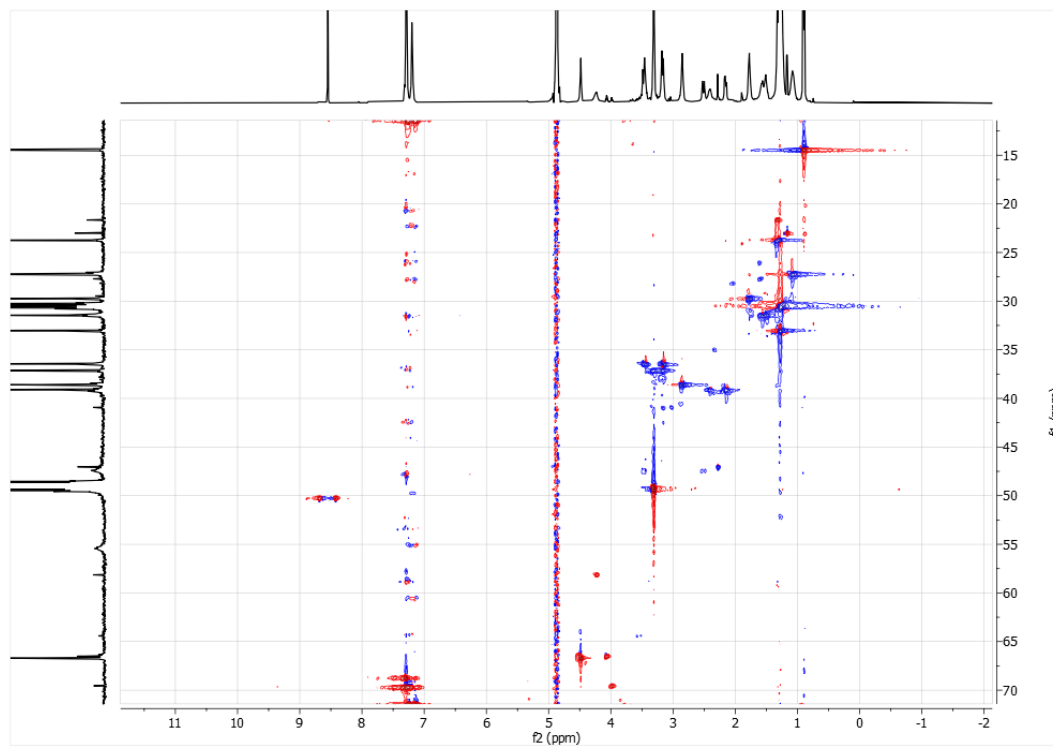

**Figure S8.** HMBC spectrum of compound **1** (TFA salt, 600 MHz, CD<sub>3</sub>OD, non-uniform sampling).

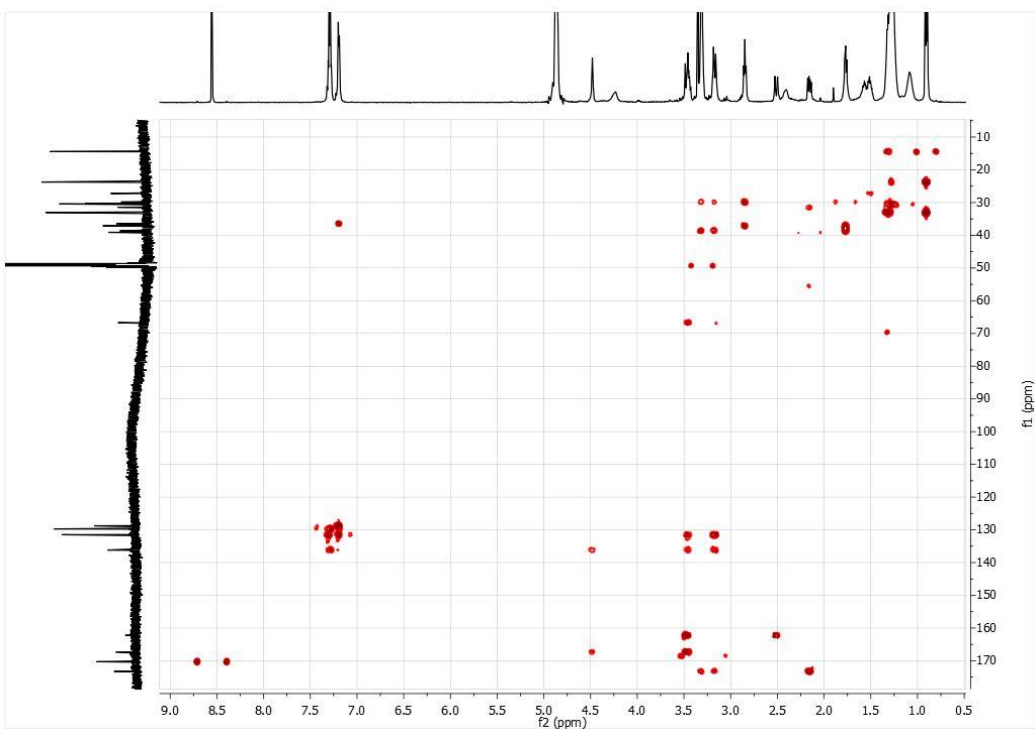

**Figure S9.** HMBC spectrum of compound **1** (TFA salt, 600 MHz, CD<sub>3</sub>OD, traditional planes).

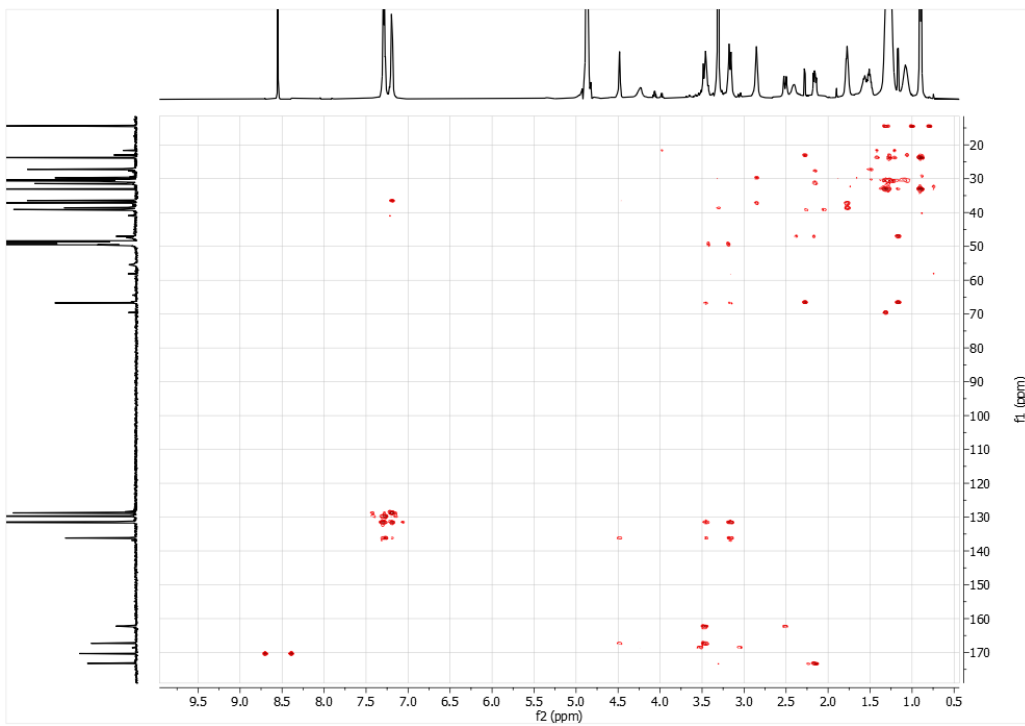



**Figure S10.** COSY spectrum of compound **1** (TFA salt, 600 MHz, CD<sub>3</sub>OD).

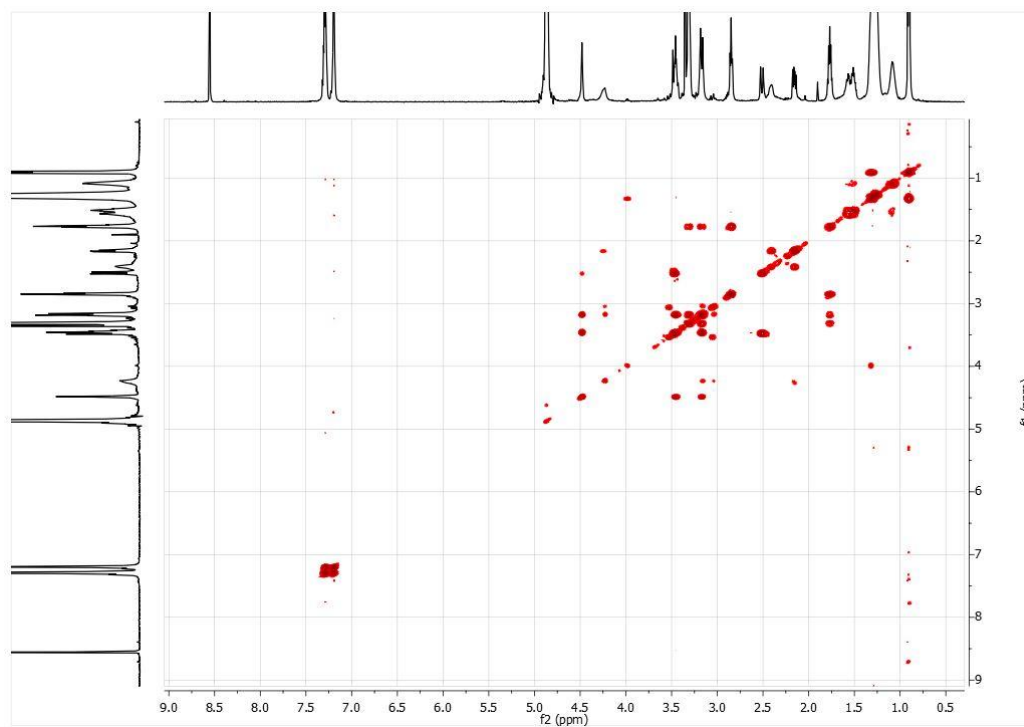

**Figure S11.** NOESY spectrum of compound **1** (TFA salt, 600 MHz, CD<sub>3</sub>OD).

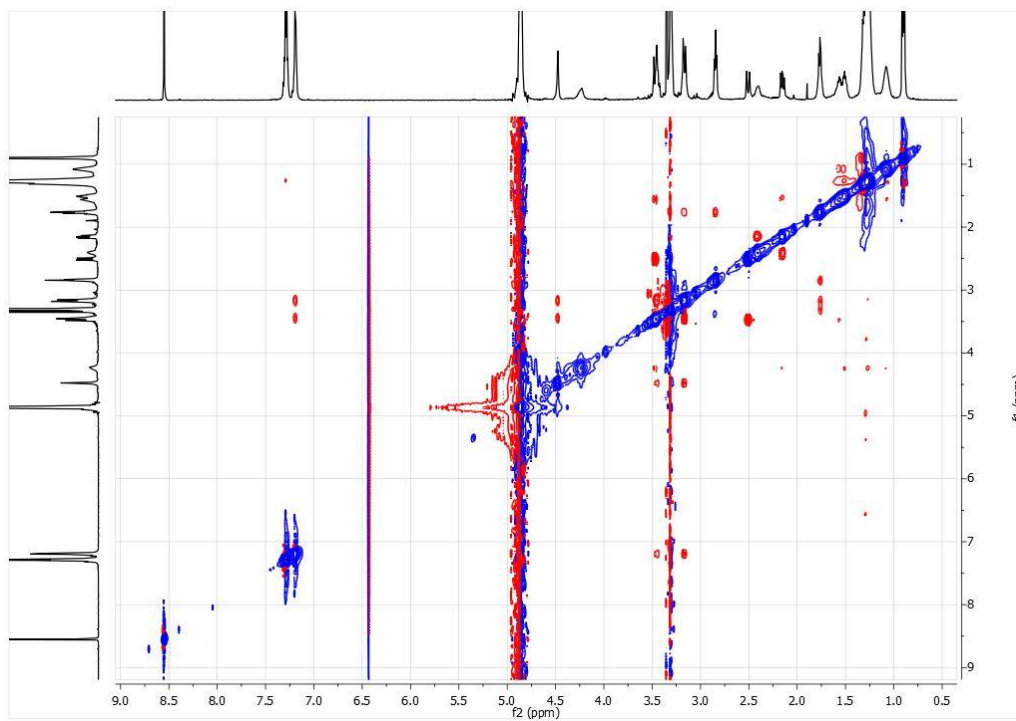

**Figure S12.** HR-ESIMS spectrum of compound **1**.

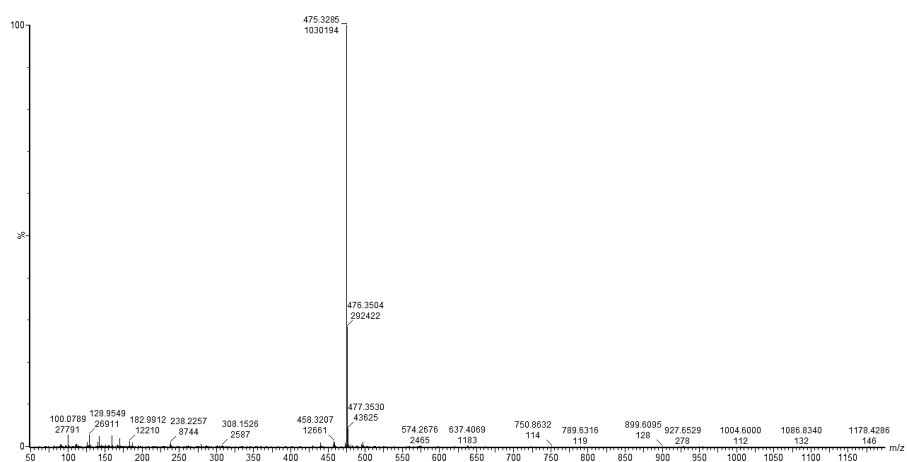

**Figure S13.**  $^1\text{H}$  NMR spectrum of compound **2** (TFA salt, 600 MHz,  $\text{CD}_3\text{OD}$ ).

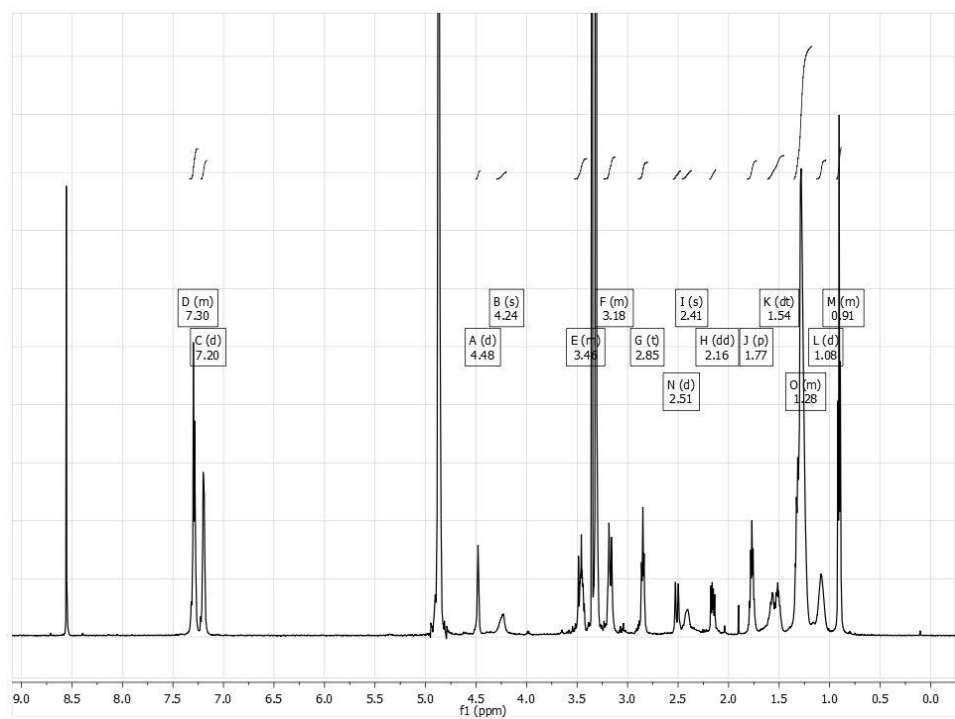

**Figure S14.**  $^{13}\text{C}$  NMR spectrum of compound **2** (TFA salt, 150 MHz,  $\text{CD}_3\text{OD}$ ).

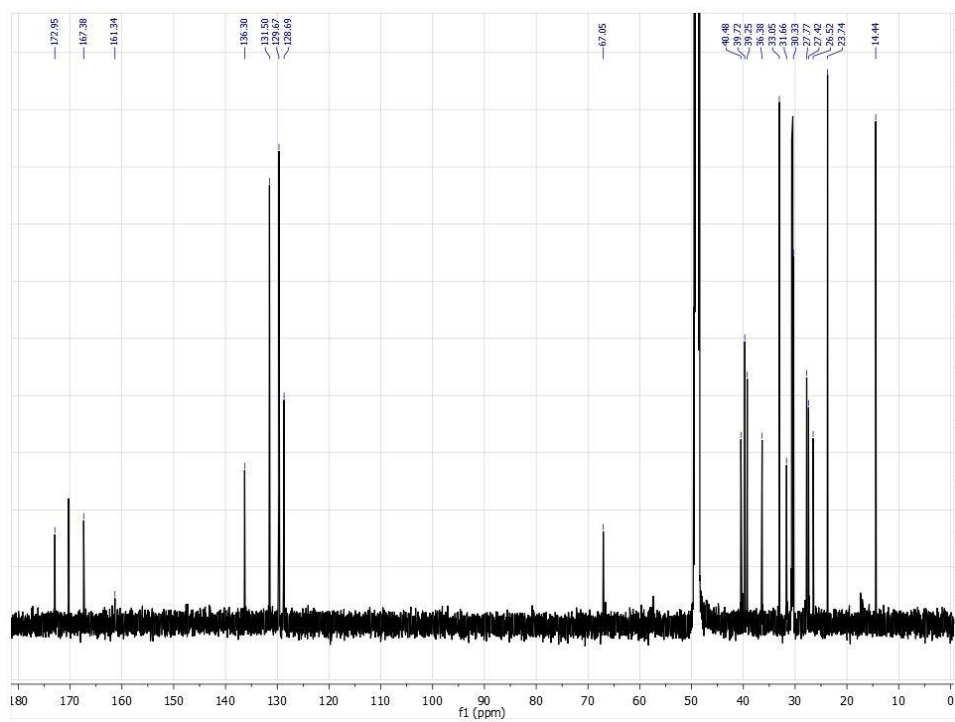

**Figure S15.** HSQC spectrum of compound **2** (TFA salt, 600 MHz, CD<sub>3</sub>OD).

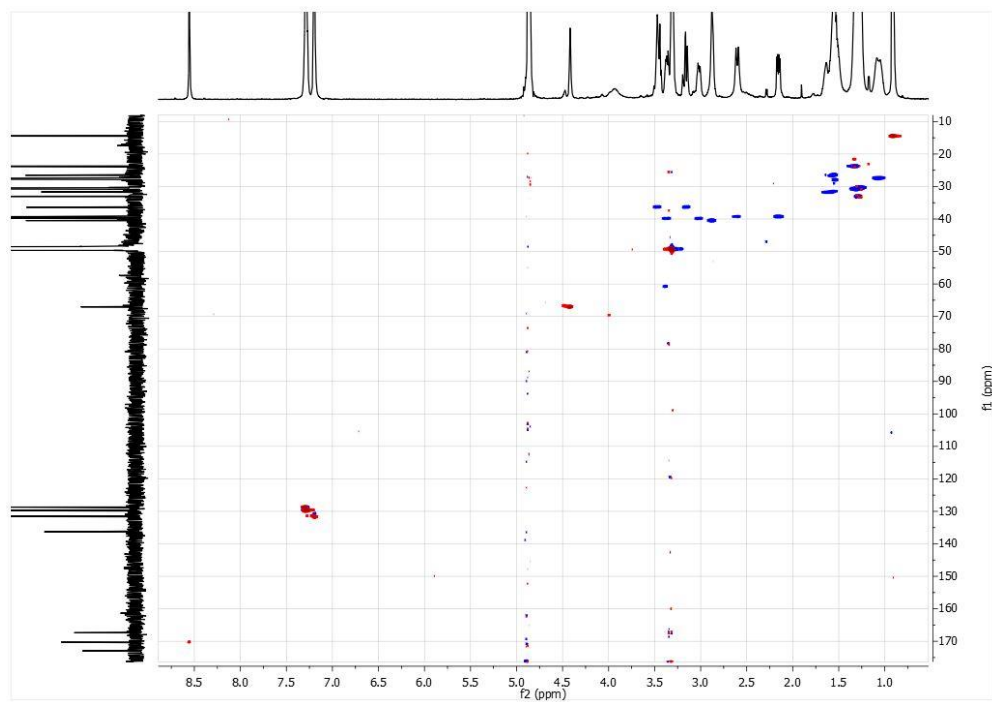

**Figure S16.** HMBC spectrum of compound **2** (TFA salt, 600 MHz, CD<sub>3</sub>OD).

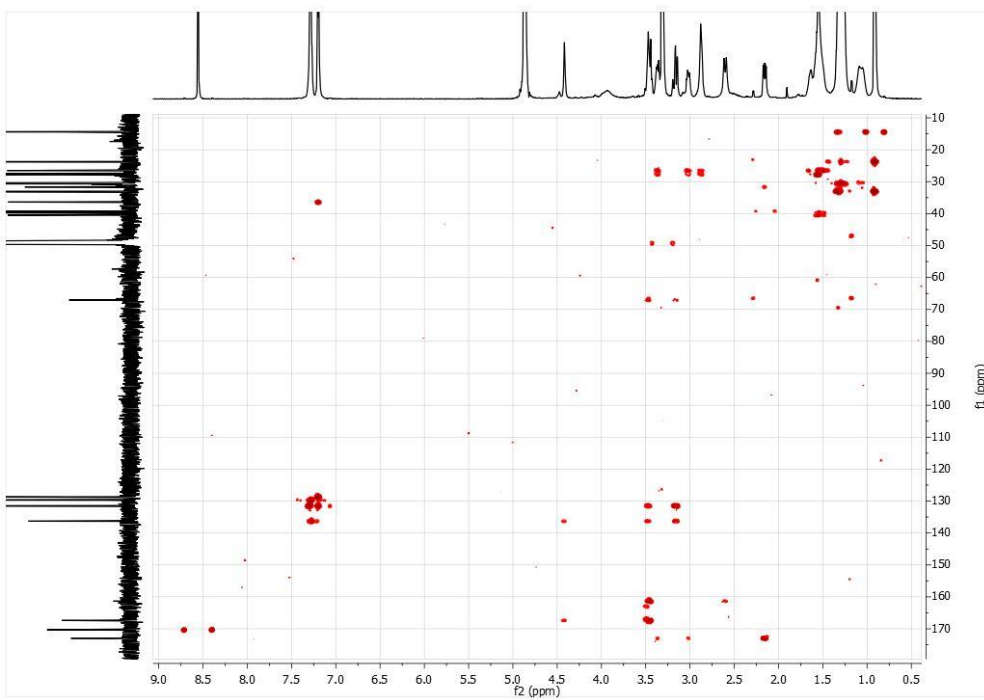

**Figure S17.** COSY spectrum of compound **2** (TFA salt, 600 MHz, CD<sub>3</sub>OD).

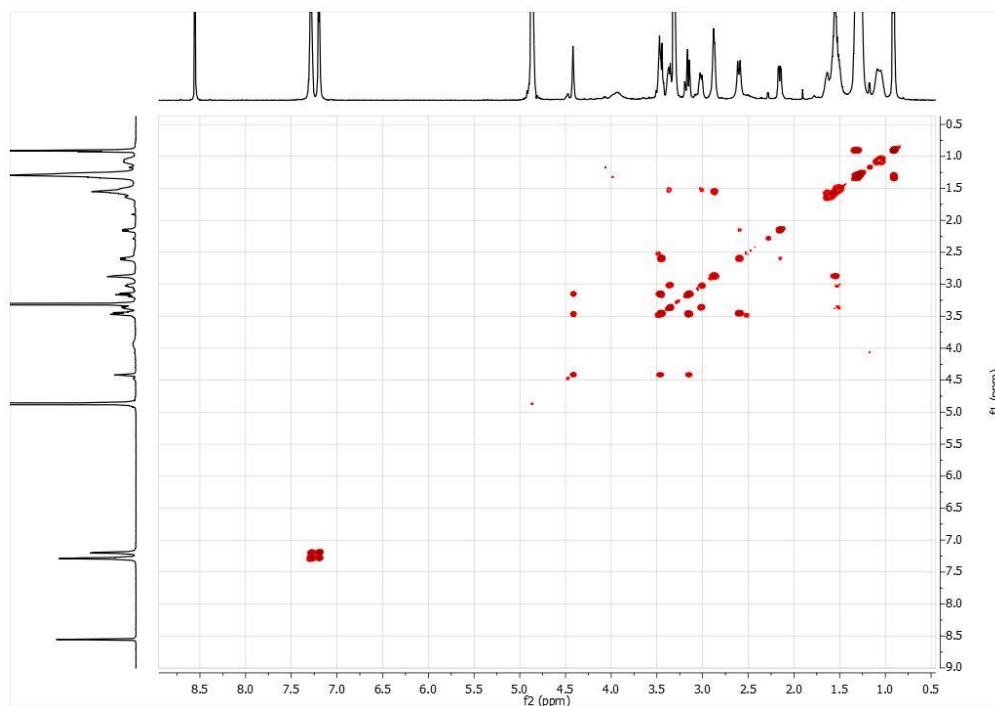

**Figure S18.** NOESY spectrum of compound **2** (TFA salt, 600 MHz, CD<sub>3</sub>OD).

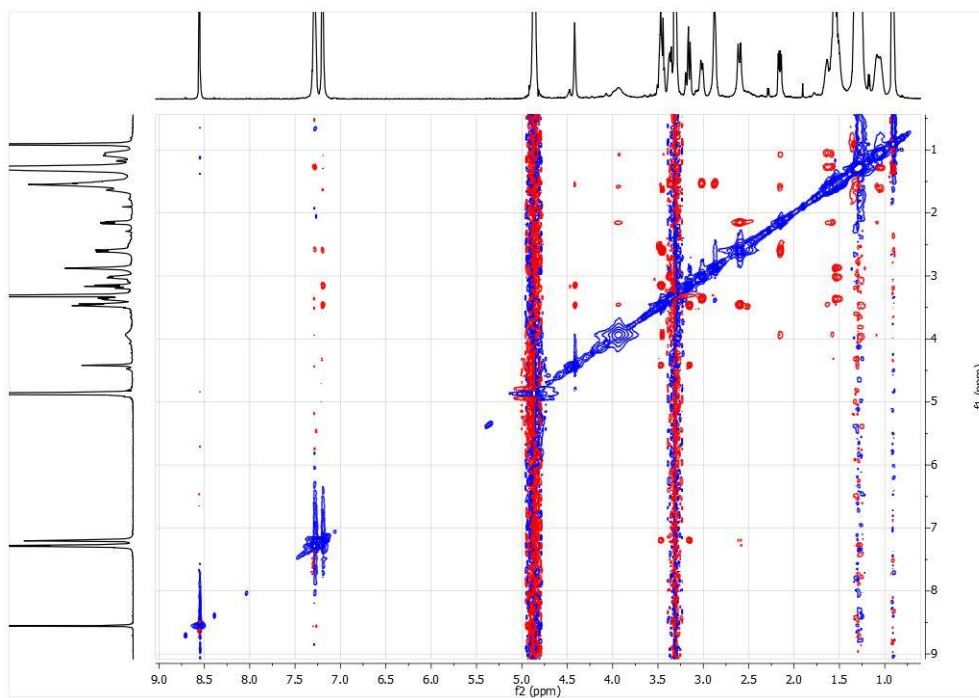

**Figure S19.** HR-ESIMS spectrum of compound **2**.

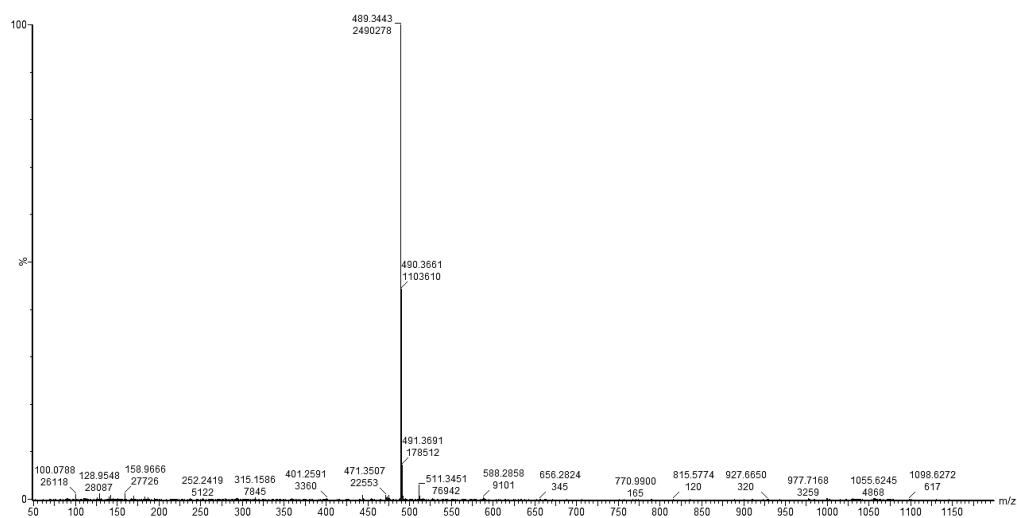

**Figure S20.**  $^1\text{H}$  NMR spectrum of compound **3** (TFA salt, 600 MHz,  $\text{CD}_3\text{OD}$ ).

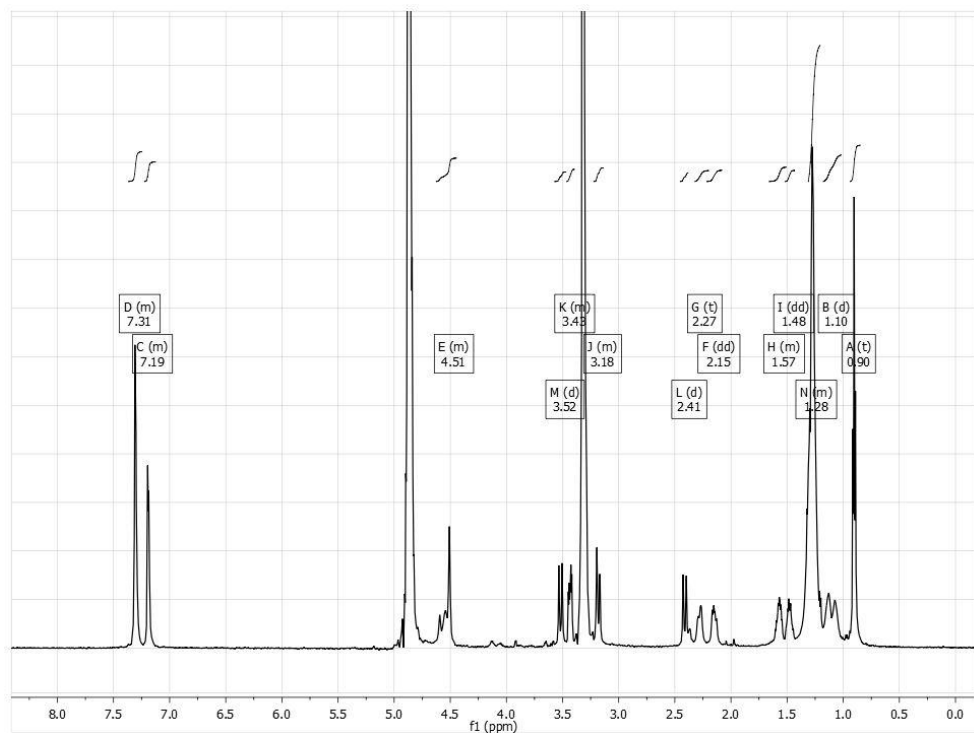

**Figure S21.**  $^{13}\text{C}$  NMR spectrum of compound **3** (TFA salt, 150 MHz,  $\text{CD}_3\text{OD}$ ).

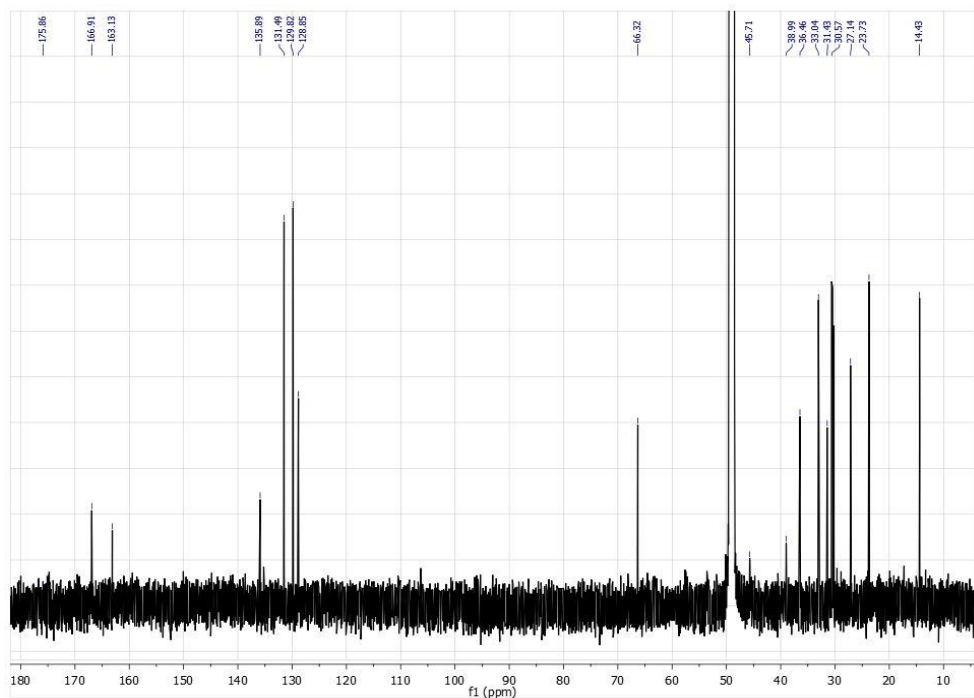

**Figure S22.** HSQC spectrum of compound **3** (TFA salt, 600 MHz, CD<sub>3</sub>OD).

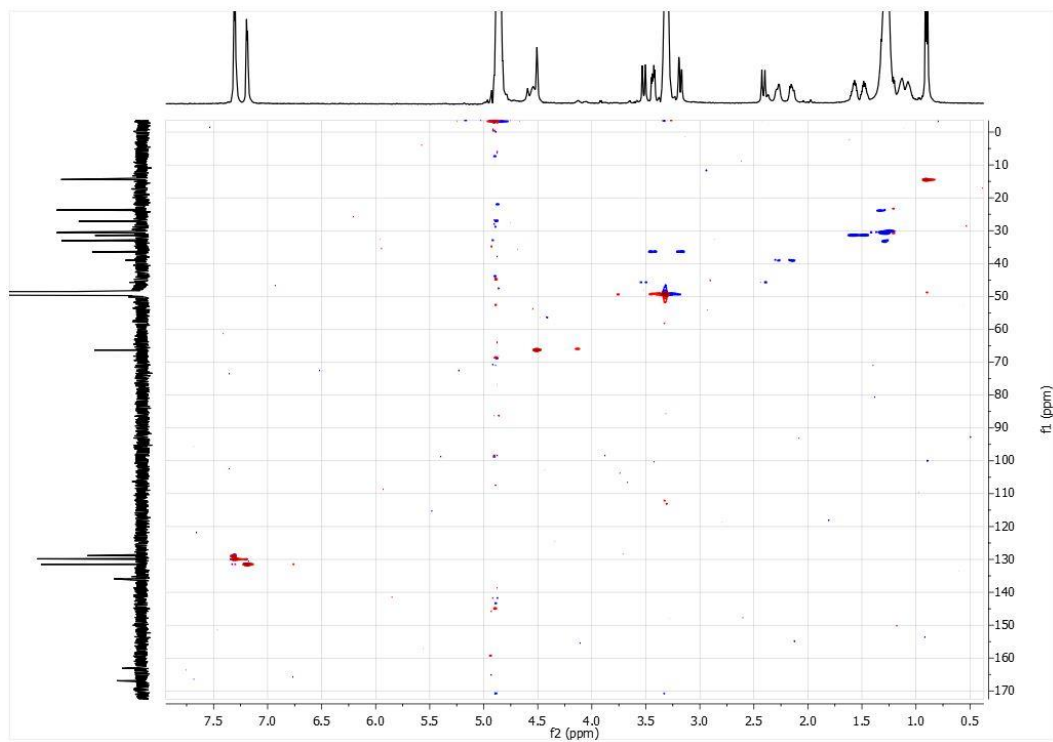

**Figure S23.** HMBC spectrum of compound **3** (TFA salt, 600 MHz, CD<sub>3</sub>OD).

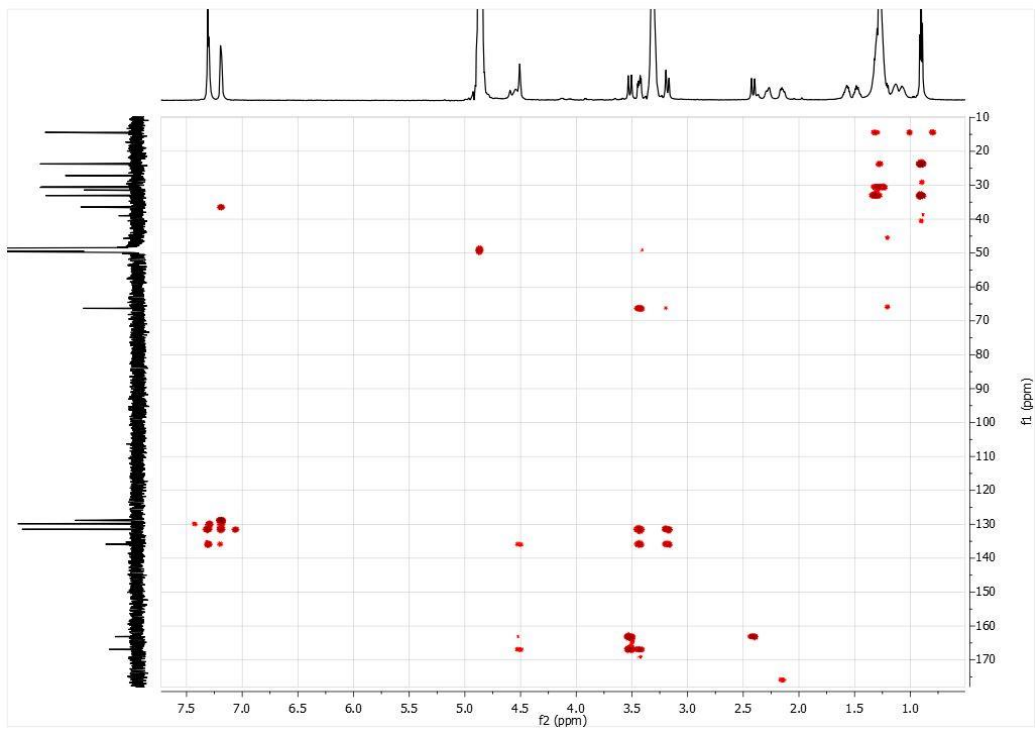



**Figure S24.** COSY spectrum of compound **3** (TFA salt, 600 MHz, CD<sub>3</sub>OD).

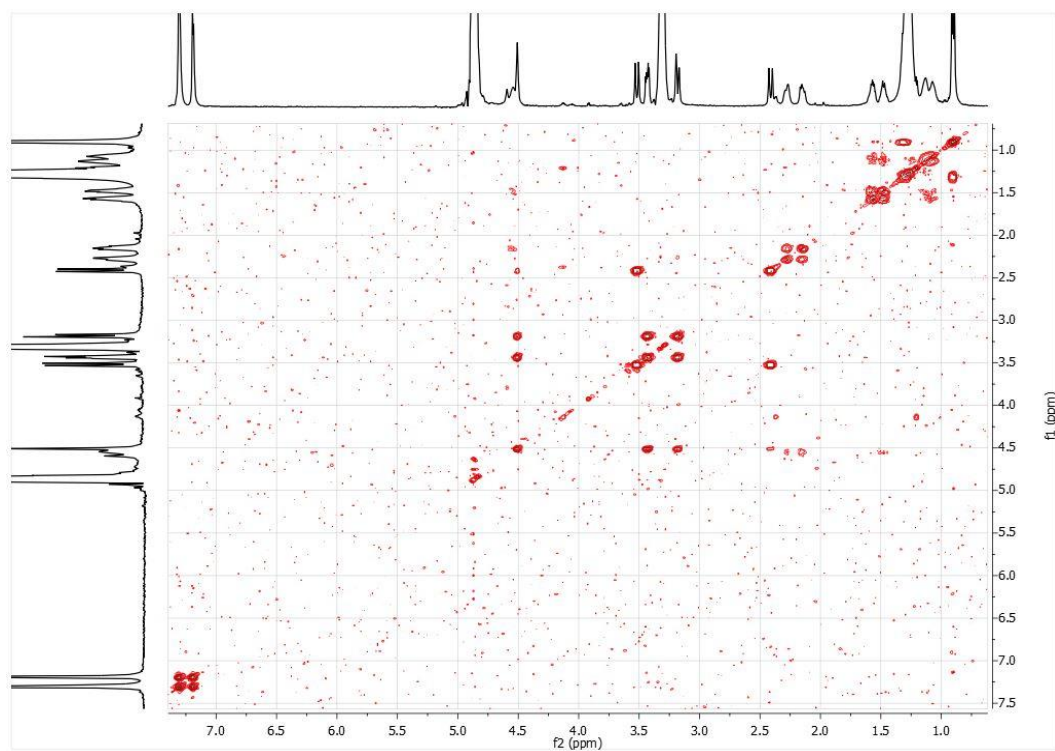

**Figure S25.** NOESY spectrum of compound **3** (TFA salt, 600 MHz, CD<sub>3</sub>OD).

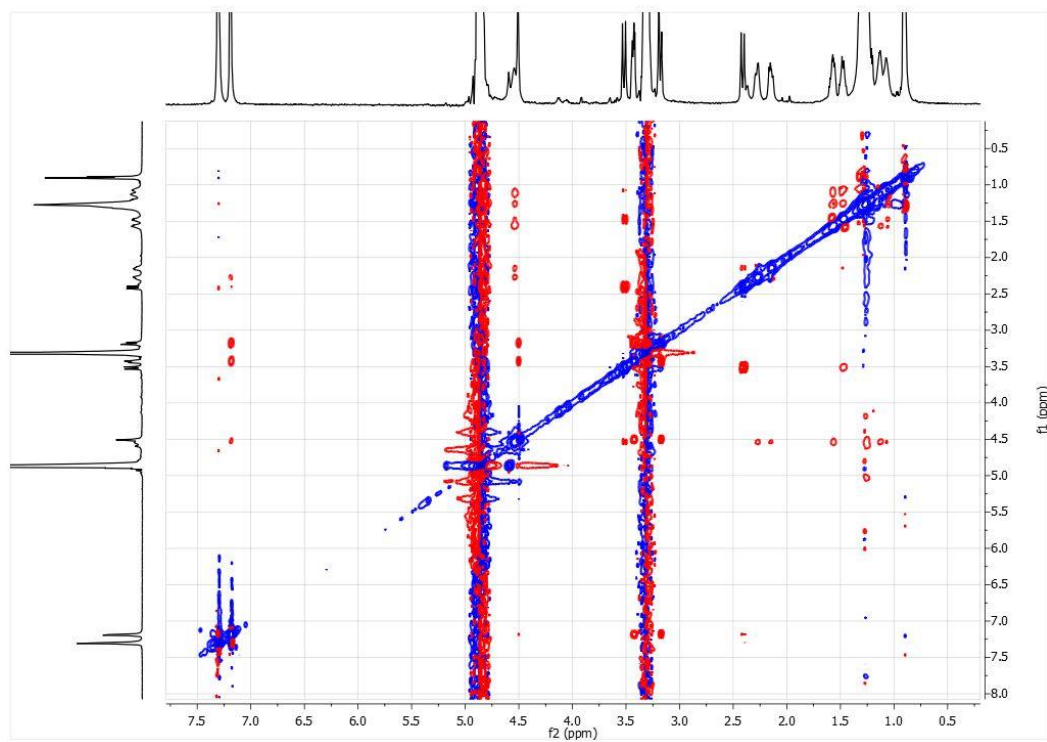

**Figure S26.** HR-ESIMS spectrum of compound **3**.

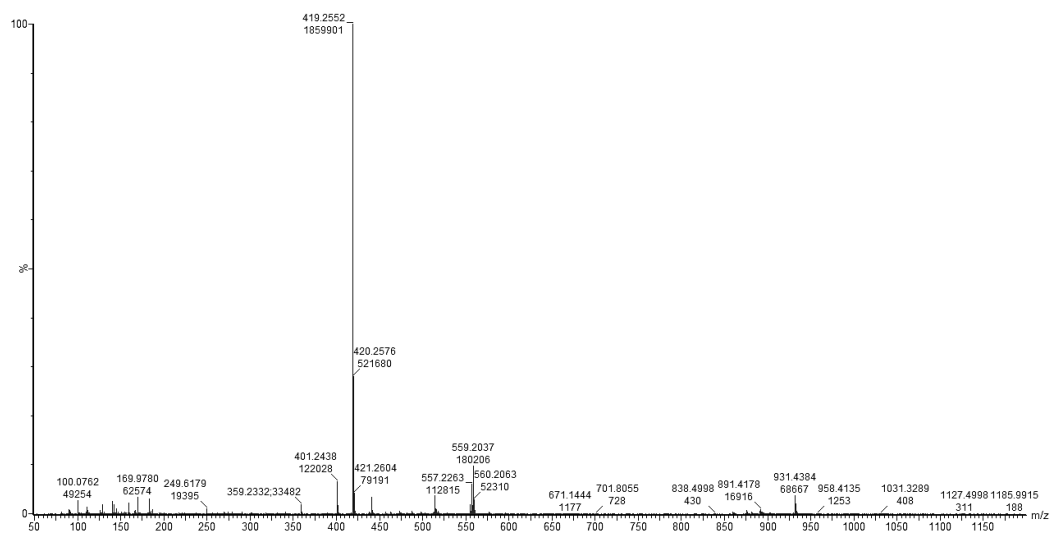

Supplement: s1 [file s1]
